# Supplementary figures and images for: The Effect of Borderline Pulmonary Hypertension on Survival in Chronic Lung Disease
Source: PubMed Central journal article supplement — Respiration. 2022 Apr 22;101(8):717–27. doi: 10.1159/000524263 (PMC9533441; doi:10.1159/000524263), 2022-04-22

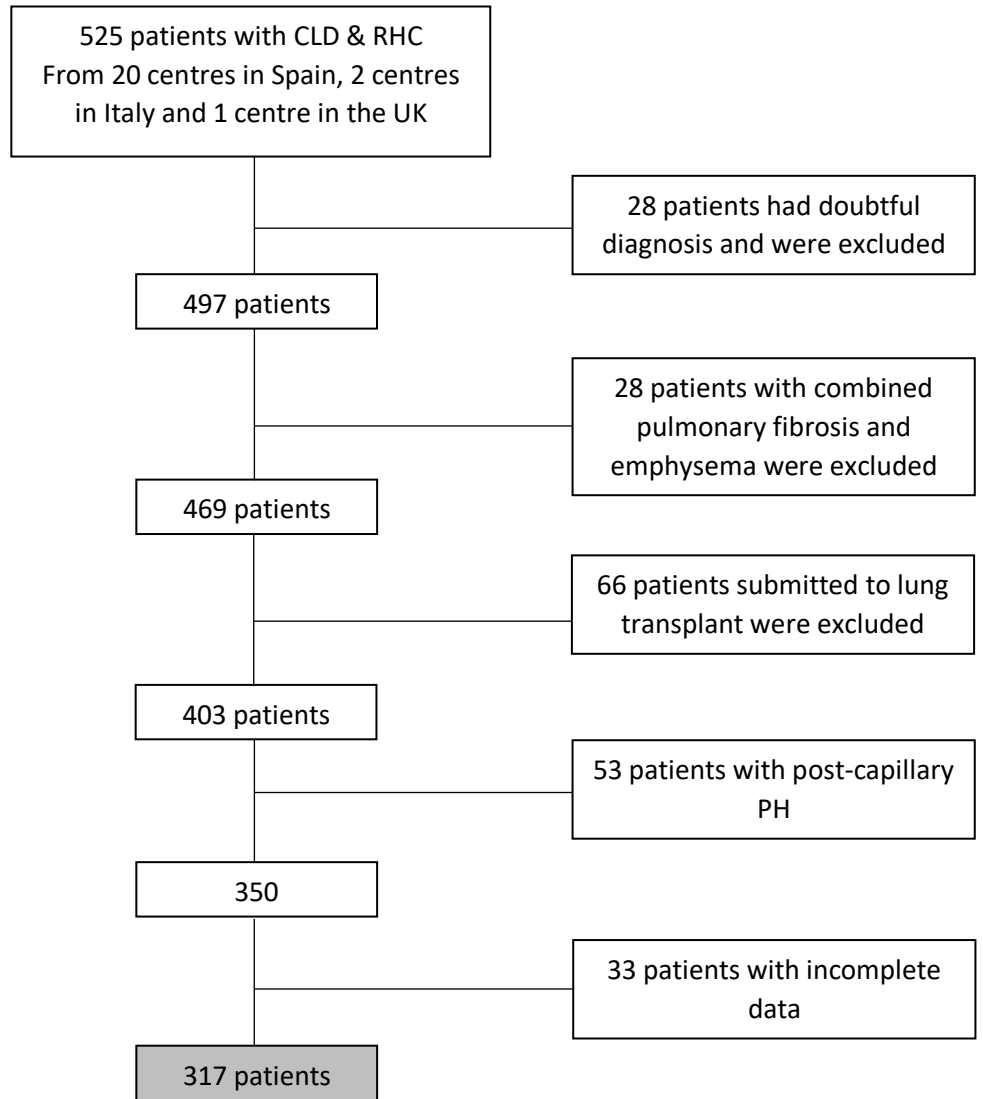

Supplement: res-0101-0717-s03.pdf [file res-0101-0717-s03.pdf]
